# Supplementary material for: Depletion of plasma membrane–associated phosphoinositides mimics inhibition of TRPM7 channels by cytosolic Mg2+, spermine, and pH
Source: PubMed Central journal article supplement (PMC6254349; doi:10.1074/jbc.ra118.004066), 2018-10-10
Supplement: supp_RA118.004066_138290_2_supp_213790_pg1h0f.pdf [file supp_RA118.004066_138290_2_supp_213790_pg1h0f.pdf]

Figure S2

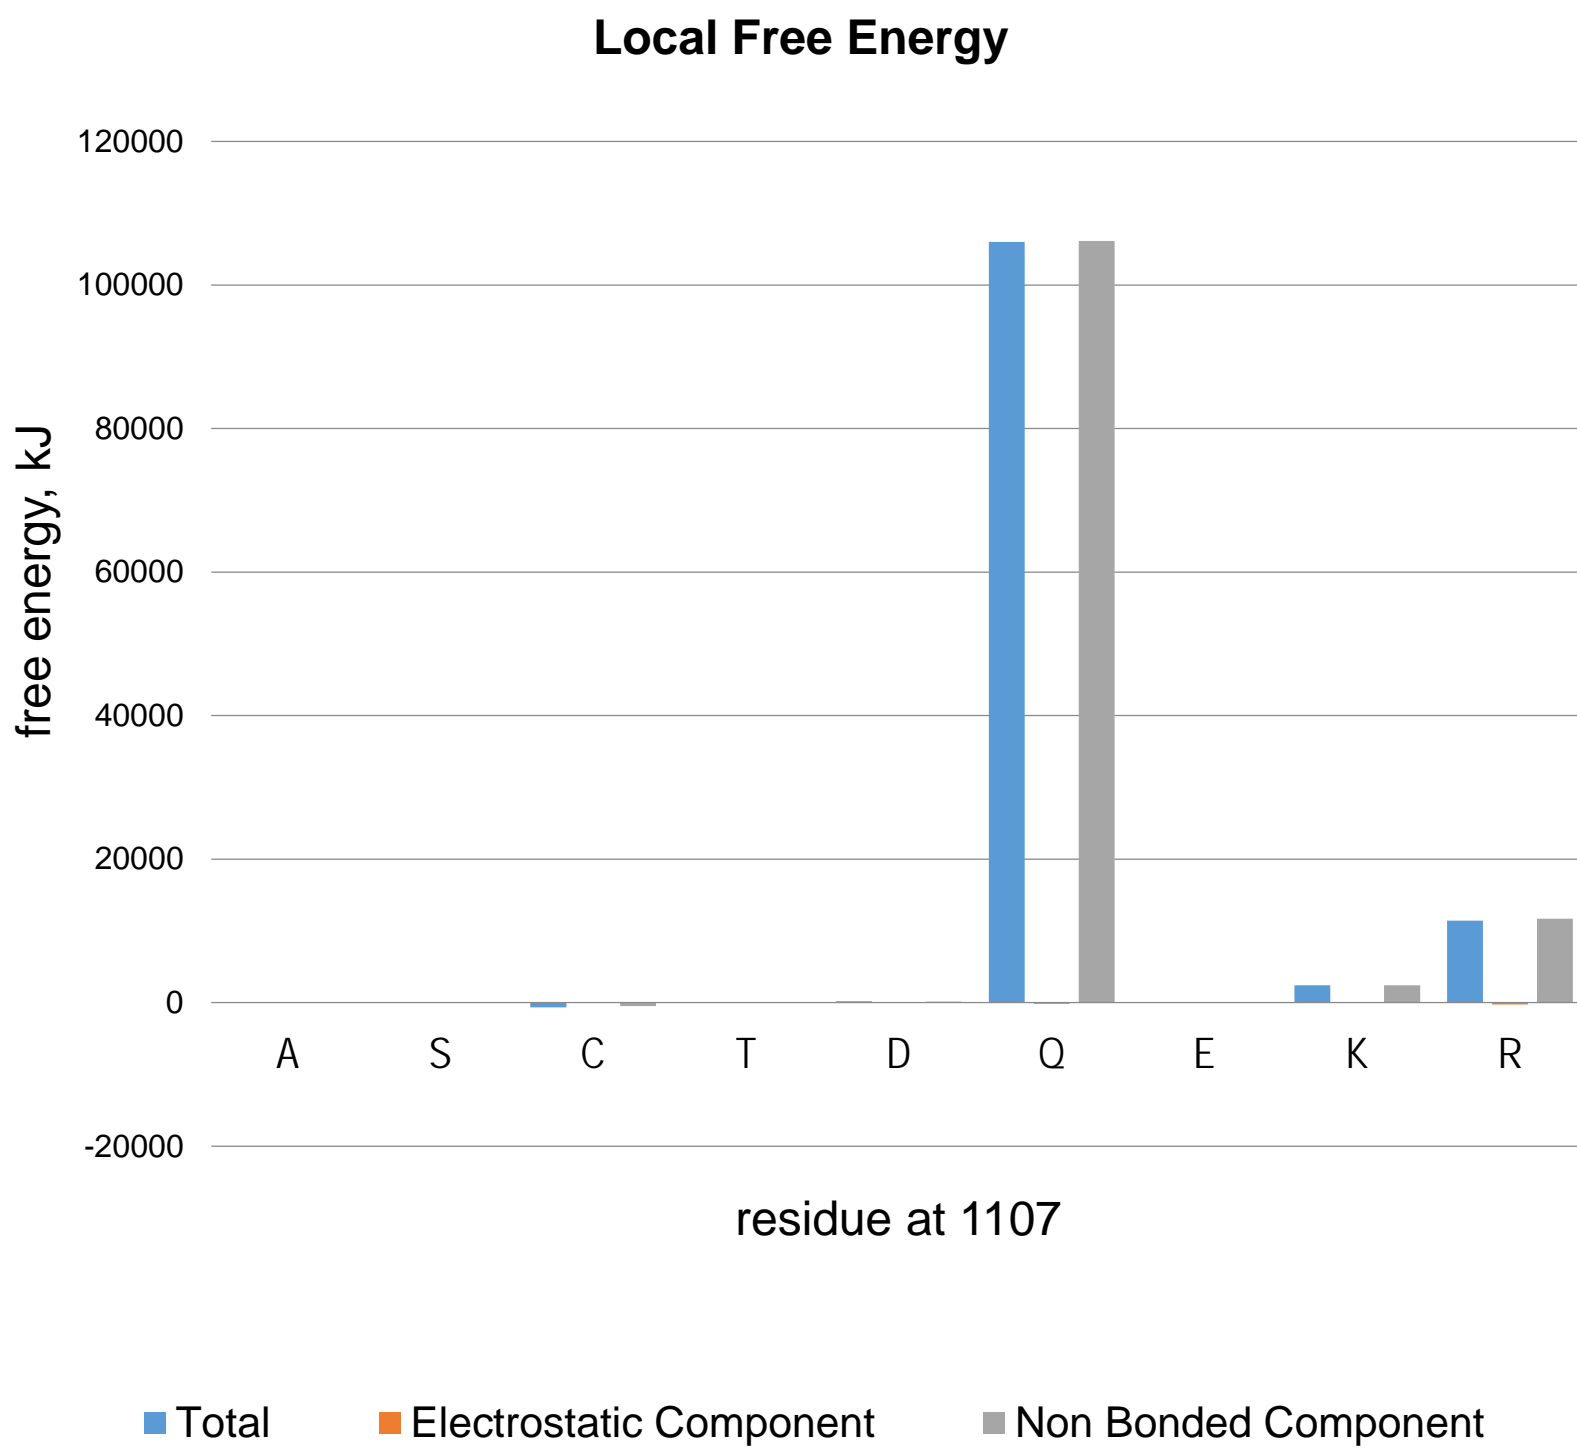

Figure S2. Graph in Fig. 8D in full scale.
