# Supplementary material for: Depletion of plasma membrane–associated phosphoinositides mimics inhibition of TRPM7 channels by cytosolic Mg2+, spermine, and pH
Source: J Biol Chem. 2018 Oct 10;293(47):18151–67. doi: 10.1074/jbc.RA118.004066 (PMC6254349; doi:10.1074/jbc.RA118.004066)
Supplement: Supporting Information [file supp_RA118.004066_138290_2_supp_213782_pg30g0.pdf]

## Supporting Information

### Depletion of plasma membrane-associated phosphoinositides mimics inhibition of TRPM7 channels by cytosolic $Mg^{2+}$ , spermine and pH

Tetyana Zhelay<sup>1</sup>, Krystyna B. Wiczerzak<sup>1</sup>¶, Pavani Beesetty<sup>1</sup>¶, Gerald M. Alter<sup>2</sup>, Masayuki Matsushita<sup>3</sup> and J. Ashot Kozak<sup>1</sup>\*

<sup>1</sup>Department of Neuroscience, Cell Biology and Physiology, Wright State University, Dayton, OH 45435, USA; <sup>2</sup>Department of Biochemistry and Molecular Biology, Wright State University, Dayton, OH 45435,

<sup>3</sup>Department of Molecular and Cellular Physiology, Graduate School of Medicine, University of the Ryukyus, Okinawa 903-0215, Japan

¶ these authors contributed equally to this work

\*corresponding author

### Content

**Figure S1:** Effect of high levels of WT and C363S VSP expression on break-in ( $I_0$ ) and maximum ( $I_{max}$ ) current amplitudes.

**Figure S2:** Graph in Fig. 8D in full scale.

# Figure S1

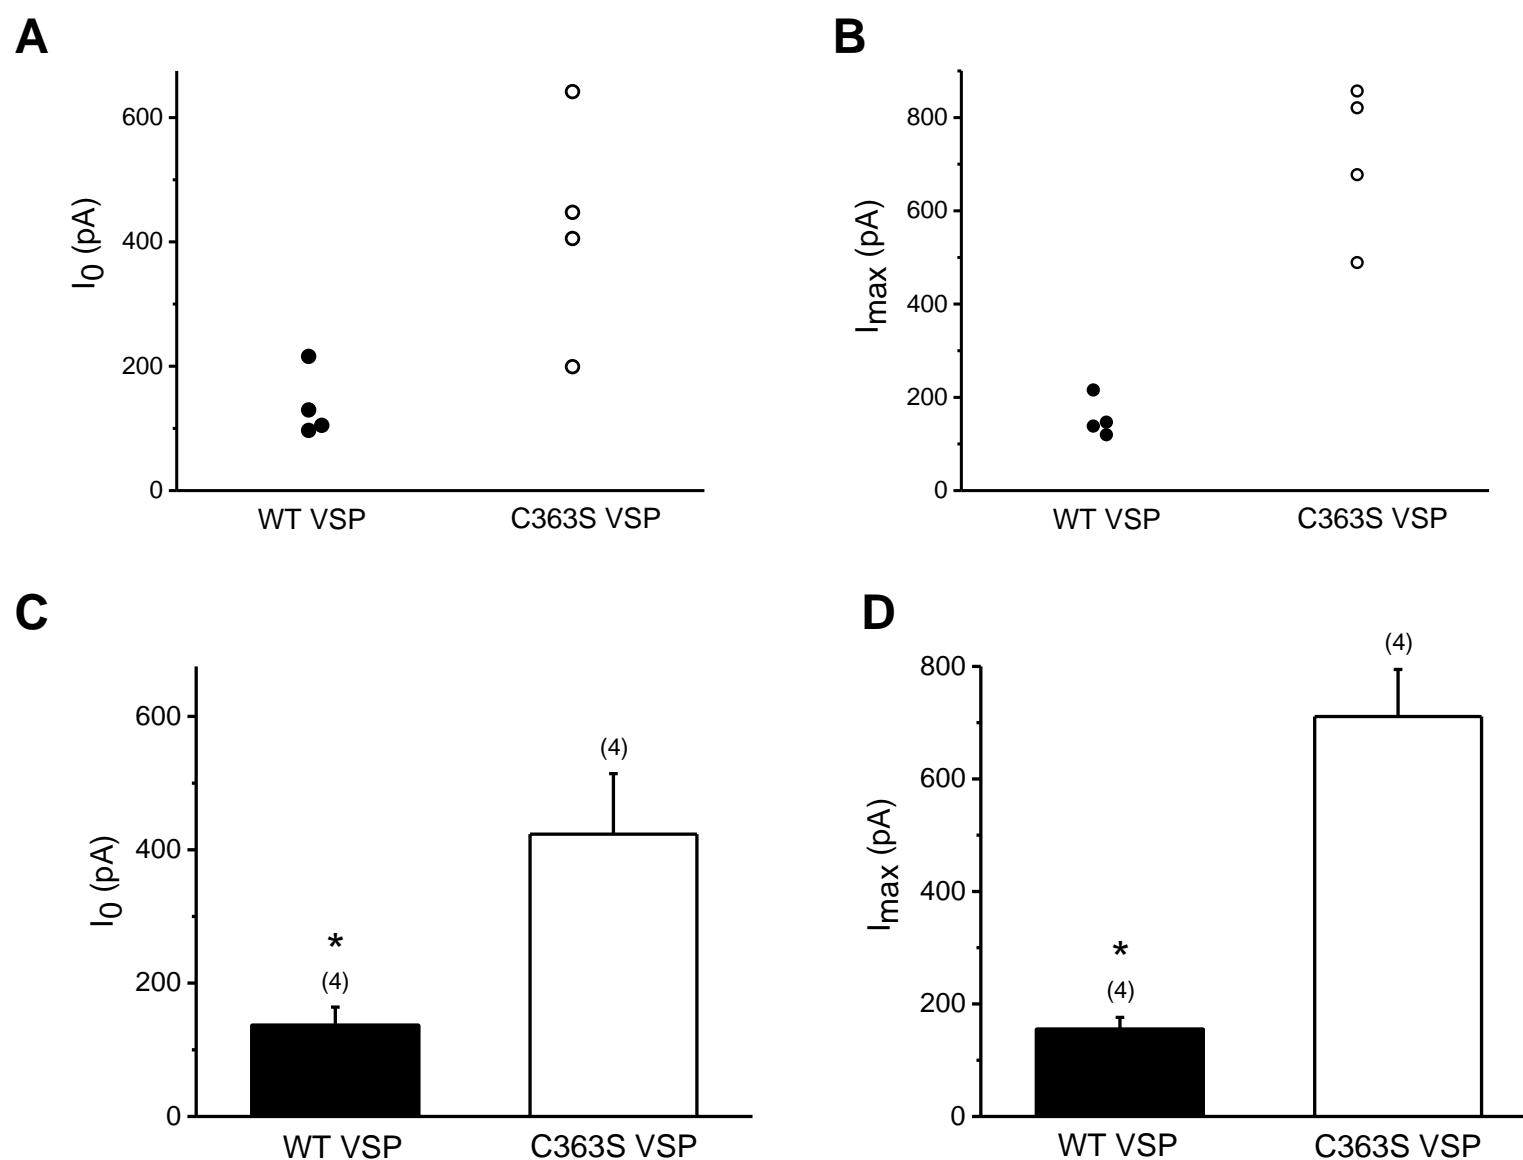

Figure S1. Effect of high levels of WT and C363S VSP expression on break-in ( $I_0$ ) and maximum ( $I_{max}$ ) current amplitudes. A, B. Scatter graph of  $I_0$  and  $I_{max}$  amplitudes in WT (filled symbols) and C363S-expressing (empty symbols) cells. C, D. Summary of data shown in A and B. For these measurements HEK cells were incubated in the transfection mix containing VSP plasmids for 2 days without washout. Voltage ramps were followed by a 4 s duration step to +30 mV. \* $p < 0.05$ , Student's pairwise t test. Internal free  $[Mg^{2+}] \approx 100$  nM.
